# Supplementary material
Source: publisher site journal article supplement (doi:10.18632/aging.206380)
Supplement: Supplementary file 1 [file pdf.pdf]

# Blue period - features of senescence 30 years after beta-galactosidase

Chisaka Kuehnemann<sup>1</sup>, Christopher D. Wiley<sup>1,2</sup>

<sup>1</sup>Jean Mayer USDA Human Nutrition Research Center on Aging at Tufts University, Boston, MA 02111, USA

<sup>2</sup>Department of Medicine, School of Medicine, Tufts University, Boston, MA 02111, USA

**Correspondence to:** Christopher D. Wiley; **email:** [christopher.wiley@tufts.edu](mailto:christopher.wiley@tufts.edu)

**Keywords:** senescence, aging, biomarkers, SASP, cell death

**Received:** November 20, 2025

**Accepted:** April 7, 2026

**Published:** May 15, 2026

**Copyright:** © 2026 Kuehnemann and Wiley. This is an open access article distributed under the terms of the [Creative Commons Attribution License](https://creativecommons.org/licenses/by/4.0/) (CC BY 4.0), which permits unrestricted use, distribution, and reproduction in any medium, provided the original author and source are credited.

## ABSTRACT

Cellular senescence is a multi-phenotypic stress or damage response characterized by a stable cell cycle arrest and the secretion of a myriad of biologically active molecules, commonly known as the senescence-associated secretory phenotype (SASP). Thirty years ago, the identification of activated beta-galactosidase during senescence led to one of the first characterizations of senescent cell accumulation during biological aging. Since then, interventions that either selectively eliminate senescent cells or suppress the SASP have demonstrated that they are a major etiological agent for several degenerative pathologies associated with aging. As interest in the development of targeted therapeutics for senescence has grown, so too has the interest in the study of these cells. This has resulted in discovery of new features and phenotypes that often associate with senescence. Here, we review several of these key features of senescence, highlighting the strengths and caveats associated with each.

## INTRODUCTION

The origins of senescence lie in the refutation of reports from Nobel laureate Alexis Carrel. By serially culturing chicken fibroblasts in media supplemented with chicken serum, Carrel described a state of cellular immortality by which cells could proliferate indefinitely [1]. It has since been suspected that the addition of sera may have inadvertently contaminated the cultures with new fibroblasts [2, 3]. In the 1960's, Leonard Hayflick published seminal manuscripts demonstrating that primary human fibroblasts do not have unlimited replicative potential, contrary to Carrel's findings, and in fact undergo a state of permanent arrest in response to serial cultivation [4, 5]. This phenomenon, now known as cellular senescence, was highly controversial at the time. Indeed, Hayflick's initial submission to the *Journal of Experimental Medicine* was rejected, with the rejection letter signed by future Nobel laureate Peyton Rous - who not only cited the common belief on the immortality of cultured cells, but described

Hayflick's speculation of this divisional limit as a driver of aging as "rash". In the years since this first characterization, senescence has expanded from a perceived tissue culture artifact to a *bona fide* driver of aging and degenerative disease.

Discovery of cellular senescence in tissue culture led to speculation of its role in the context of physiology. While the name "senescence" suggested a role in aging, without evidence of increased senescence with age, it remained largely speculative whether senescence was anything other than a tissue culture phenomenon. This changed in 1995, when accidental incubation of x-gal with senescent cells in an acidic buffer resulted in robust blue staining [6]. This senescence-associated beta-galactosidase (SA- $\beta$ -gal) is common to multiple forms of senescence, and staining of aged human tissues confirmed the increased presence of senescence with age [6]. Several additional features of senescence have been discovered in the thirty years since the description of SA- $\beta$ -gal, each with their own strengths and

weaknesses both in culture and *in vivo* (Table 1). Here we review several of these key features of senescence and how our understanding has evolved over time, noting that there have been both breakthroughs and caveats in the discovery and characterization of these features in the intervening years.

## Proliferative arrest

From the earliest days of Hayflick and Moorhead, serial cultivation of non-transformed primary cells has been associated with eventual replicative exhaustion and stable proliferative arrest, typically in the G1 phase of the cell cycle [4]. Subsequently, this arrested state now known as cellular senescence was demonstrated in many cell types, and in response to multiple inducers including - but not limited to - telomere attrition [7], genotoxic stress [8], oncogene activation [9], oxidative stress [10], mitochondrial dysfunction [11], or pharmacological inhibition of proliferative pathways [12–14]. Distinct from quiescent cells and other forms of terminal arrest, cultured senescent cells often continue to increase in mass and diameter in the absence of cell division, at least at low cell densities, and this cellular hypertrophy itself may contribute to the cell cycle arrest [15]. The senescence arrest is often referred to as “growth arrest”, but to disambiguate between this increase in size (which occurs in senescence and thus could be considered “growth”) and the arrest of cell division, we will refer to this phenotype as “proliferative arrest” in this article.

Senescence-associated proliferative arrest is commonly detected by a combination of loss of proliferation markers, coupled to elevation of one or more cyclin-dependent kinase inhibitors (CDKNs). In culture, proliferation can be measured by cell counts, markers such as Ki67 and proliferating cell nuclear antigen (PCNA), or incorporation of labeled thymidine analogs (due to thymidine’s preferential incorporation into DNA during replication). Initially, radiolabeled thymidine was used to detect cell cycle arrest, but development of non-radiolabeled alternatives such as bromodeoxyuridine (BrdU; which allows detection by immunofluorescent detection) or 5-ethynyl-2'-deoxyuridine (EdU; which allows detection using CLICK chemistry) have become the preferred approach in more recent years. Each of these markers are lost from senescent cells, and often expressed as percentages of the whole population [16, 17].

Because the proliferative arrest is driven by elevation of one or more cyclin-dependent kinase inhibitors (CDKNs), they can be considered markers of senescence. The two most commonly studied CDKNs associated with senescence are p21 (*CDKN1A/p21<sup>WAF1</sup>*)

and p16 (*p16<sup>INK4a</sup>*, one of many transcripts from the *CDKN2A* locus), but two other CDKNs, p27 (*CDKN1B/p27<sup>KIP1</sup>*) and p15 (*CDKN2B/p15<sup>INK4b</sup>*), have also been linked to senescence. All four of these transcripts have been shown to increase with age in at least some tissues [18–21]. Genetic models that eliminate cells with high p21 or and p16 expression have demonstrated a role for both in the promotion of age-related diseases [22–24], but the roles of p27 and p15 in aging and other senescence-associated conditions remain unclear.

Importantly, cell cycle arrest and CDKNs on their own are not sufficient to identify senescent cells. *CDKN1A* has multiple transcripts with identical ORFs, and the mouse expresses both an abundant transcript that responds to circadian rhythms and genotoxic stress, and a less abundant transcript that increases with age [18] – which cannot be distinguished by standard 3' RNA-seq techniques. The human gene has a similar set of transcripts, but it is not currently known how these might vary with senescence and aging. Similarly, *p16* is only one of multiple transcripts that originate from the *CDKN2A* locus, including *p19<sup>ARF</sup>* (mouse)/*p14<sup>ARF</sup>* (human), most with a common 3' end, similar to the *CDKN1A* locus. These shared 3' ends require alternative methods to detect specific transcripts, such as selective primers, 5' RNA-seq, or extended reads. In addition, p16 is not only elevated during senescence, but also during some forms of macrophage activation [25–27] and in response to mutation of the retinoblastoma (*Rb*) gene [28]. Both p21 and p27 are also elevated during quiescence [29], and p15 is a potentially important regulator of myeloid differentiation [30, 31]. Finally, CDKNs can be transiently elevated in response to stress or damage, but decline once these are resolved [32]. Thus, CDKNs have roles outside of senescence that cannot be overlooked when studying the senescent phenotype and when considering the effects of CDKN targeting on health outcomes.

Similarly, cell cycle arrest can originate from cellular states other than senescence. Many differentiated cell types - such as neurons, muscle cells, or podocytes - undergo stable cell cycle arrest upon differentiation without being considered senescent. In addition, many cell types undergo G0 arrest, or quiescence, in response to nutrient or growth factors withdrawal, contact inhibition, or from cues from the tissue microenvironment [29, 33], and quiescent cells are often able to resume proliferation in response to changes in these factors.

Finally, there are a growing number of reported exceptions to the stability of cell cycle arrest in

**Table 1. Key features of cellular senescence and biomarkers.**

| Feature                                          | Description                                                                                                    | Markers                                                                                                                                        |
|--------------------------------------------------|----------------------------------------------------------------------------------------------------------------|------------------------------------------------------------------------------------------------------------------------------------------------|
| Proliferative arrest                             | Stable, typically irreversible halt in cell division. Increased cell size and flattened morphology.            | Loss of Ki67/PCNA, reduced BrdU/EdU incorporation, increased CDKNs (p16, p21, p27, p15).                                                       |
| SA- $\beta$ -gal and lysosomal glycosidases      | Increased lysosomal $\beta$ -galactosidase activity detectable at pH 6.0, also increased $\alpha$ -fucosidase. | GLB1, FUCA1, $\beta$ -glucuronidase.                                                                                                           |
| Senescence-Associated Secretory Phenotype (SASP) | Secretion of inflammatory cytokines, chemokines, growth factors, proteases, EVs, and oxylipins.                | NF- $\kappa$ B–driven cytokines, type I interferon response, cGAS–STING activation, EVs, oxylipins (e.g., dihomom-15d-PGJ2).                   |
| Nuclear alterations                              | Structural and epigenetic changes including loss of nuclear integrity and persistent DNA damage.               | Loss of Lamin B1 and HMGB1/2, cytosolic chromatin fragments (CCFs), DNA-SCARS, TAF, SAHF, SADS.                                                |
| Mitochondrial dysfunction                        | Mitochondrial DNA depletion or loss of electron transport chain activity.                                      | Increased mitochondrial mass, ROS, mtDNA release, altered NAD <sup>+</sup> /NADH ratio, ETC dysfunction.                                       |
| Lysosomal alterations                            | Increased lysosomal content, altered pH, leakage, and elevated autophagy/exocytosis.                           | Lysosomal expansion, cholesterol partitioning, autophagy upregulation, lysosomal processing of CCFs.                                           |
| Metal accumulation                               | Accumulation of ferrous and ferric iron, copper, zinc, manganese, magnesium, and potassium.                    | Ferritin/hemosiderin, labile iron; copper transport dysregulation.                                                                             |
| Lipofuscin accumulation                          | Build-up of oxidized proteins, lipids, and metals due to impaired lysosomal degradation.                       | Autofluorescent granules, Sudan Black B staining.                                                                                              |
| Persistent cell survival                         | Persistent cell survival in the presence of cell death stress.                                                 | Upregulation of BCL-2 family proteins, decoy receptors, altered DR5/cFLIP. Resistance or sensitivity to necroptosis, ferroptosis, parthanatos. |

response to a variety of stimuli [34–39]. This reversion can extend beyond cell cycle arrest and into other features of senescence [37], but can also result in pro-carcinogenic states [40–43]. These cells with reversible senescence features may be largely indistinguishable from irreversible senescence arrest *in vivo*, so it is unclear how prevalent the persistent cell cycle arrest is in an organism. Thus, while proliferative arrest is a defining feature of senescence, on its own it is insufficient to identify senescent cells.

### Beta-galactosidase and other lysosomal glycosidases

As described above, senescent cells often stain positive for beta-galactosidase. Following the discovery of SA- $\beta$ -gal, it was subsequently determined that senescence-associated beta-galactosidase was lysosomal beta-galactosidase, encoded by the gene *GLB1*, explaining the low-pH specificity [44]. Surprisingly, it remains somewhat unclear how senescent cells stain positive for SA- $\beta$ -gal. Western blots suggest that *GLB1* protein level is increased during senescence in human [44] and mouse [45] cells, and both *GLB1* RNA and protein levels have been reported to increase with age in mice, where they predict lifespan and health status [45]. By comparison, RNA levels of *GLB1* do not appear to increase

substantially in cultured senescent human cells, despite the increase in activity [46, 47]. Notably, a recent study suggests that lysosomes may undergo leakage during senescence, and this may explain why SA- $\beta$ -gal does not appear to exclusively stain lysosomes in senescent cells, though this remains an open question [48].

Another lysosomal glycosidase was subsequently identified as a biomarker of senescence. Alpha-fucosidase (gene: *FUCA1*) is involved in *N*-glycan degradation, releasing fucose in a manner similar to beta-galactosidase does for galactose [46]. Notably, *FUCA1* RNA, protein, and activity levels all increase with senescence, and generally more highly than beta-galactosidase – though it is much less-studied than beta-galactosidase at this point. The same report also indicated a small increase in beta-glucuronidase, another lysosomal glycosidase.

Detection of either beta-galactosidase or alpha-fucosidase is subject to a number of confounding variables. For example, either enzyme might be elevated in response to lysosomal expansion or in cell types with high lysosome numbers, regardless of senescent state. For example, macrophages were shown to reversibly elevate beta-galactosidase in response to the secretions of senescent cells [26]. Notably, high confluence can also result in elevated beta-galactosidase staining [6] and *GLB1*

expression [29]. Finally, beta-galactosidase positivity can be subjective, and even objective measures (such as intensity thresholding) can reveal SA- $\beta$ -gal negative cells in cultures that are entirely arrested. Lysosomal enzymes such as SA- $\beta$ -gal and  $\alpha$ -fucosidase often manifest along a continuum rather than as an all-or-none signal, creating a gradient in which higher activity reflects a greater likelihood of senescence. Thus, while senescence-associated beta-galactosidase remains a key feature of senescence, the number of exceptions to this, coupled to newer biomarkers of senescence, suggest that it may no longer be the gold standard it once was.

## **The Senescence-Associated Secretory Phenotype (SASP)**

Initially, senescence was thought to be a driver of aging through the replicative arrest, which would prevent the regeneration or renewal of a tissue [49, 50], but eventually it became clear that senescent cells secrete a number of biologically active molecules that can have potent local and systemic effects. This senescence-associated secretory phenotype (SASP) was hinted at in findings that unidentified factors found in conditioned media from senescent cells can drive cell non-autonomous effects on wild type and cancer epithelial cells [51]. In 2008, a series of manuscripts identified a number of inflammatory cytokines and chemokines, growth factors, and matrix metalloproteinases as key molecules secreted by senescent cells [52–54]. Since the initial characterization of the SASP, >1000 proteins have been identified as secreted from senescent cells, many of which are inflammatory cytokines driven by either NF- $\kappa$ B and/or in response to a type I interferon response [55–58]. This interferon response is due to activation of the cGAS-STING signaling pathway in response to cytosolic DNA. The source of cytosolic DNA can be variable, as reported sources include de-repression of LINE-1 elements [56], nuclear blebbing of chromatin into the cytosol [57], and release of mitochondrial DNA due to sub-apoptotic minority mitochondrial outer membrane permeabilization [58]. Through these mechanisms, senescent cells can drive sterile inflammation. This makes them a major candidate for driving age-related inflammation, or “inflammaging” [59]. Beyond cytokines, senescent cells also release several molecules associated with vasoconstriction, coagulation, and fibrosis – suggesting a role for senescence in tissue remodeling responses following injury [60–62]. At least some of these factors do not appear to be linked to the inflammatory cytokine production, as the hemostatic features of senescence are activated in the absence of inflammatory cytokine production [62].

Not all SASP components are secreted as soluble proteins. Senescent cells also release extracellular

vesicles (EVs) that can have various effects [63–67]. Notably, many proteins found in EVs from senescent cells correspond to similar secreted pathways, including inflammation, extracellular matrix regulation, and hemostasis, whereas the lipids found in these EVs primarily consist of membrane phospholipids and sphingomyelins [67]. Finally, microRNAs can be encapsulated in EVs from senescent cells [68, 69]. Surprisingly, a cell surface protein, DPP4, limits the uptake of these EVs by proliferating cells [63]. Conversely, senescence-associated EVs can transfer senescence signatures from senescent chondrocytes to non-senescent chondrocytes [64] and fibroblasts [66]. In addition to the hundreds of proteins that compose the SASP, several lipid species are released by senescent cells, most notably many oxygenated polyunsaturated fatty acids collectively known as oxylipins [70, 71]. Senescence-associated oxylipins include a combination of prostaglandins, thromboxanes, and leukotrienes that are functionally associated with inflammatory, coagulation, vasoconstriction, algisia, and fibrosis. Furthermore, oxylipin biosynthesis can reinforce senescence, promote proinflammatory features of the SASP, and drive fibrosis. One oxylipin in particular, dihomo-15d-PGJ2, accumulates in the intracellular space and can be detected during senolysis [70]. Thus, multiple factors beyond proteins may play a role in senescence.

As an important caveat, sources of SASP factors are not limited to senescent cells. Many factors, such as viral or bacterial infection, can result in cytosolic DNA and activation of interferon responses independent of senescence. Similarly, inflammatory responses can occur during immune system activation in the absence of senescence, and HMGB1 – released from the nuclei of senescent cells [72], is also released following lytic cell death [73]. With >1000 identified factors comprising at least some version of the SASP [52, 60, 62, 67, 70, 74–76], many different secreted factors might present like the SASP in datasets without originating from senescent cells. Advances in single cell technology have added clarity to the field by allowing identification of senescent cell types and distinguishing between senescent and immune cells in a way that whole tissue/population assays cannot [77–79]. Finally, it is important to note that the SASP is not a single phenomenon, but a collection of phenotypes that can vary with time, cell type, and inducer [11, 52, 60, 71, 80].

## **Organelle alterations**

### **Nuclear changes**

Senescent cells undergo several changes to their nuclear architecture that are essential for both proliferative

arrest and SASP. Notably, senescent cells lose RNA expression and protein levels of lamin B1 (LMNB1), resulting in structural changes to the nuclear envelope, which results in release of cytosolic chromatin fragments (CCFs) and activation of the cGAS-STING pathway, as described above [57, 81]. Similarly, epigenetic changes during long term senescence can result in LINE-1 element mobilization and activation of cGAS [56]. As LINE-1 element transposition can result in new double-stranded breaks [82], this may also help to reinforce cell cycle arrest. Furthermore, loss of nuclear localization/expression of high mobility group box proteins (HMGB1 and HMGB2) alter nuclear architecture and absence of these factors from nuclei can thus act as biomarkers of senescence [72, 83]. Importantly, many of these markers are reduced during senescence, and as senescent cells comprise a small proportion of cells, even in old age, they cannot be reliably detected in whole tissue assays. Thus, these markers instead require individual cell approaches when analyzing them in tissues.

Nuclear changes can also occur in response to specific inducers of senescence. In response to DNA double strand breaks, telomere attrition, and related stressors, senescent cells develop persistent foci that stain positive for several markers of DNA damage, most notably  $\gamma$ -H2AX and 53BP1. These persistent foci, sometimes called DNA-SCARS (segments of chromatin alteration reinforcing senescence), result in continuous DNA damage signaling – leading to stable cell cycle arrest and promoting parts of the SASP [84, 85]. While initially hinted at in cells with eroded telomeres due to end replication failure, many of these foci can occur at telomeric DNA, resulting in co-staining between telomeres and DNA damage markers - often called telomere-associated foci (TAF). TAF not only occur during replicative exhaustion, but also often in response to other inducers [86]. Because telomeric DNA damage is more difficult to repair, these foci tend to persist and may be a major reinforcer of the cell cycle arrest [87]. Similarly, in response to activation of p16, a subset of senescent cells can form regions of facultative heterochromatin compaction. These senescence-associated heterochromatin foci (SAHF) occur near clusters of proliferation-associated genes and may thus help reinforce senescence [88]. Conversely, satellite heterochromatin can become reactivated, resulting in senescence-associated decondensation of satellites (SADS) [89]. Thus, nuclear changes can include structural, epigenetic, and genomic components.

### **Mitochondrial changes**

Senescence is often coupled to a loss of mitochondrial function, including increased mitochondrial DNA,

mitochondrial mass, and reactive oxygen species [90–92]. In addition, as mentioned above, sub-apoptotic minority mitochondrial outer membrane permeabilization can result in release of mitochondria DNA into the cytosol, driving inflammatory components of the SASP [58]. Mitochondrial dysfunction, including partial or complete mitochondrial DNA depletion or loss of electron transport chain activity, can also drive senescence without the inflammatory SASP components by lowering the cytosolic NAD<sup>+</sup>/NADH ratio [11]. Thus, loss of mitochondrial function is not only a feature of senescence, but can also influence senescence and the SASP in multiple ways [91, 92].

### **Lysosomal alterations**

As mentioned above, lysosomal function is altered during senescence, including increased lysosomal numbers and function, leakage, levels of glycosidases, and cholesterol partitioning [46, 48, 93], and decreased lysosomal pH. Macroautophagy and chaperone-mediated autophagy are also elevated during senescence, with increased exocytosis of lysosomal components to the extracellular space, forming a subset of SASP factors [76]. Similarly, CCFs that bud off of the nucleus are processed by the lysosome [94]. This would suggest that dysregulated lysosomal processes are a key feature of senescence, but the relationship between lysosomes and senescence is just beginning to be understood *in vivo* [95]. For example, blocking autophagy can result in buildup of damaged macromolecules and activate signaling pathways that can trigger senescence [96], whereas overexpression of TFEB which controls lysosome expansion - prevents senescence in various models [97]. The role of lysosomes in aging and cellular senescence has been reviewed in more detail elsewhere [95].

### **Metal accumulation**

A growing body of evidence indicates that senescent cells accumulate elevated levels of several metals, including iron, potassium, magnesium, manganese, zinc, and copper [98–103]. Of these, iron is perhaps the best-studied, with accumulation of both ferrous and ferric iron observed in senescent cells [100, 102]. Hemolysis can drive senescence in nearby cells at least in part by increasing iron, and chelation of iron can lower levels of multiple SASP factors [102]. Iron, stored in hemosiderin and ferritin, can be detected in senescent cells histologically [100, 102], and senescent cells can even be detected by MRI using iron as a target [102]. More recently, copper accumulation in senescent hepatocytes was identified as a vulnerability for their elimination in a mouse model of hepatosteatotic disease [104]. Less is known about the accumulation of other metals, or their consequences, but these may eventually

become key markers of senescence as the mechanisms behind their accumulation are elucidated.

## Lipofuscin

Lipofuscin is an intracellular pigment that consists of oxidized or otherwise damaged proteins, lipids (especially polyunsaturated fatty acids), and metals. As lipofuscin accumulates in many tissues with age and age-related degenerative disease, it is often considered a biomarker of aging [105–107]. Consistent with the observed increases in metals and oxidation of polyunsaturated fatty acids during senescence, senescent cells accumulate lipofuscin, which can be further visualized with Sudan Black B [108]. Lipofuscin is thought to arise from the failed degradation of macromolecules by the lysosome, resulting in persistent autofluorescent lysosomal storage bodies [109], consistent with alterations in lysosomal function during senescence. Indeed, lipofuscin is known to drive both lysosomal permeability and inflammasome activation [110], suggesting the possibility that this pigment might drive these phenotypes in senescent cells. Importantly, lipofuscin is not exclusive to senescent cells, appearing in postmitotic neurons, cardiomyocytes, and skeletal muscle cells [106, 111, 112]. Overall, lipofuscin is a useful marker of senescent cells, but like other markers it cannot be exclusively used in their identification.

## Persistent cell survival

Senescence is a stress or damage response, but it is not the only response to stress or damage. Notably, many drivers of senescence can also result in cell death modalities such as apoptosis, necroptosis, ferroptosis, and parthanatos [113]. Indeed, genetic interventions and molecules that convert senescence into cell death, often called “senolytics” regardless of cell death modality, are the primary mechanism by which senescent cells have been shown to drive degenerative pathologies [22, 114, 115]. In agreement, many of the key features of senescence, including persistent DNA damage, mitochondrial dysfunction, and oncogene activation, can also result in variegated forms of cell death. It is therefore often stated that a key feature of senescent cells is cell death resistance, but as with other features of senescence, there is considerable heterogeneity in these responses. These include:

### Apoptosis

The most-studied variant of cell death, apoptosis results in cell death via a highly regulated program that includes caspase activation, release of cytochrome C from mitochondria, DNA fragmentation and laddering,

membrane phospholipid inversion, and release of intracellular contents in membrane-bound apoptotic bodies. As mentioned above, senescent cells show some features of apoptosis, such as minority mitochondrial outer membrane permeabilization, but survive in the face of these stressors [58]. This is at least in part due to elevation in anti-apoptotic proteins BCL-2, BCL-W, BCL-xL, and/or MCL1, as inhibition of these proteins selectively drives senescent cells into apoptosis [116–119], and similar results are seen with several intrinsic apoptosis inducers [120]. Apoptosis can also be triggered via the extrinsic pathway in response to cell death ligand binding, and senescent cells often elevate or secrete decoy receptors for many of these extrinsic apoptotic signaling pathways, potentially protecting them from extrinsic induction of cell death. However, senescence-inducing stimuli have also been reported to elevate the proapoptotic DR5 receptor [121, 122], though varying reports suggest both elevation or downregulation of cFLIP, depending on cell type and inducer [122–124]. This variability is seen in senescent cancer cells, where chemotherapeutic-induced senescence can confer either resistance or sensitization to TRAIL-induced apoptosis [121]. Thus, it does not appear that resistance to apoptosis is a universal feature of senescence, but rather a highly contextual phenotype.

### Lytic programmed cell death

Many forms of programmed cell death result in lysis of the cell via disruption of plasma membrane. These modalities are often highly inflammatory due to release of cellular contents, including immunogenic damage-associated molecular patterns such as nucleic acids and HMGB1 [113] – which might manifest in a manner similar to senescence at the level of tissue and biofluids. Notable modalities of lytic cell death with known relationships to senescence include necroptosis, ferroptosis, and parthanatos. Like senescence, necroptosis increases with age, in response to many of the same stimuli [125, 126]. In addition, senolytic treatment reduces markers of necroptosis, whereas inhibition of necroptosis lowers senescence, suggesting that these two processes may undergo reciprocal control [127]. Activation of necroptosis occurs primarily in response to TNF- $\alpha$ , a component of the SASP, suggesting that this relationship may be cell non-autonomous (i.e., senescent and necroptotic cells are distinct populations), though these links are difficult to distinguish in population/whole tissue analyses. Future studies will require specific staining of senescence and necroptosis markers in the same tissue to determine if senescent and necroptotic cells represent the same or distinct populations. Ferroptosis is another form of lytic death that results from

peroxidation of the inner leaflet of cellular membranes, catalyzed by intracellular labile iron. Senescent cells display several features in common with ferroptosis, including increases in lipoxygenases [70, 71, 128], increased labile iron [102, 103, 129], and increased membrane-bound PUFA [129]. The net effect of these changes is increased sub-ferroptotic stress, similar to apoptosis. As with apoptosis, reports have indicated that senescent cells are either resistant, or sensitive, to ferroptosis [62, 100, 103]. Importantly, because senescent cells are often hypertrophic relative to non-senescent cells of the same type in culture, seeding cells at similar numbers can result in higher confluence and cell-to-cell contacts in senescent cultures relative to non-senescent. This increased confluence might explain reports of ferroptosis resistance, as cell contacts antagonize ferroptosis [130]. Finally, parthanatos is a form of lytic cell death that occurs in response to overproduction of poly-ADP-ribose from NAD<sup>+</sup> as a result of poly-ADP-ribose polymerase (PARP) activation following genotoxic or oxidative stress [131]. It has features in common with apoptosis, such as chromatin compaction, but is lytic in that it is membrane-disruptive [131]. PARP inhibitors can prevent the development of parthanatos in response to genotoxic stress from oxidative injury, such as from ischemia-reperfusion injury, instead favoring senescence [132].

Because of these relationships and the continued survival of senescent cells, it is often stated that a key feature of cellular senescence is cell death resistance. Given the variability in these responses, it might be helpful to characterize this phenotype as persistent cell survival in the presence of cell death stress due to compensatory activation of pro-survival pathways. Because these pro-survival pathways can be sufficient or insufficient to confer resistance to exogenous death inducers depending on the cell type and inducer, contextual interpretation may be required when studying the relationship between senescence and cell death.

## CONCLUSIONS

The field of cellular senescence has come a long way since its inception, moving beyond the culture dish, into model organisms and even human patients over the course of the last 30 years. These advances have allowed for targeting senescent cells and the SASP, but the variability and non-specificity of individual senescence features necessitate robust characterization to avoid experimental artifacts. Indeed, markers of senescence are often not binary, but rather occur across a gradient [133]. Because no single feature or marker of senescent cells is exclusive to the senescent state, it is

recommended that multiple markers be used together for assessment of senescence. Several reviews have proposed a consensus for a minimum set of biomarkers to confirm senescence, and the reader is directed to these for further reading [16, 17].

Conversely, cells with features of senescence can still drive pathology, even if not all criteria for characterization of senescence are met, so therapeutic opportunities may arise out of the study of senescence biology even in the absence of identification of cells with minimal requirements for senescence. For example, release from atazanavir treatment not only reduces markers of senescence in culture and *in vivo*, but also improves cardiovascular phenotype. Similarly, myofibroblasts have features in common with senescent cells and can be killed in a manner similar to senescent cells by the senolytic ABT-263, and thus improve dermal fibrosis [134].

The overlap between senescence phenotypes and macrophages raise an important question: how much of the myriad phenotypes associated with aging, regeneration, and degenerative disease that result from interventions targeted to senescence are confounded by the shared phenotypes between senescence and activated macrophages or related cells? Targeted elimination of p16-positive cells or using beta-galactosidase-targeted prodrugs is likely to eliminate at least some macrophages, and more recent studies have shown that the popular senolytic therapy of dasatinib plus quercetin can also kill p16-positive macrophages [135], suggesting that elimination of a subset of macrophages may be beneficial for age-related diseases. Interactions between senescent cells, the SASP, and macrophages add complexity to this question, and macrophages themselves may become senescent [136, 137]. Regardless of whether they are senescent or not, if macrophages that display senescence signatures turn out to be therapeutically useful targets, then the senescence features we use to identify them could be just as important as the senescent cells themselves.

As highlighted throughout this review, the senescent phenotype is complex, with variation in virtually every feature outlined in this article (Figure 1). This heterogeneity has created new translational challenges, not only in creating consensus on the identification and measurement of senescence, but also because different senescent cell populations often respond differently to intervention depending on cell type, tissue, time, and stressor [14, 104, 122, 138]. Adding to the complexity, the advent of newer technologies, from fluorescent probes to single cell and positional multi-omics, has resulted in application of these technologies to

senescence [139–142]. Integration of these datasets into the larger framework of senescence biology is an evolving process that requires increasing sophistication in its analysis. This has resulted in significant development of novel computational approaches to identify and characterize senescent cells [143–150]. These approaches are likely to become more common as additional large datasets become available, but limitations remain. For example, 3'-RNA-seq often cannot distinguish between transcripts in the *CDKN1A*, *CDKN2A*, and *CDKN2B* loci, limiting the utility of retroactive analysis of datasets generated in this manner. To address these concerns, advances in transcriptomics

have led to the development of several gene expression signatures used to detect and quantify senescence burden in place of the CDKNs [17, 151–153]. While these methods have limitations, they can supplement other data and allow for retroactive approximation of senescence in datasets that might not otherwise be achievable. Overall, the increasing complexity found in the features of senescence is being met with increased sophistication in their analysis, and while limitations will always exist, the ultimate goal of developing better therapies will almost certainly benefit from these approaches and a nuanced understanding of senescence in the human body.

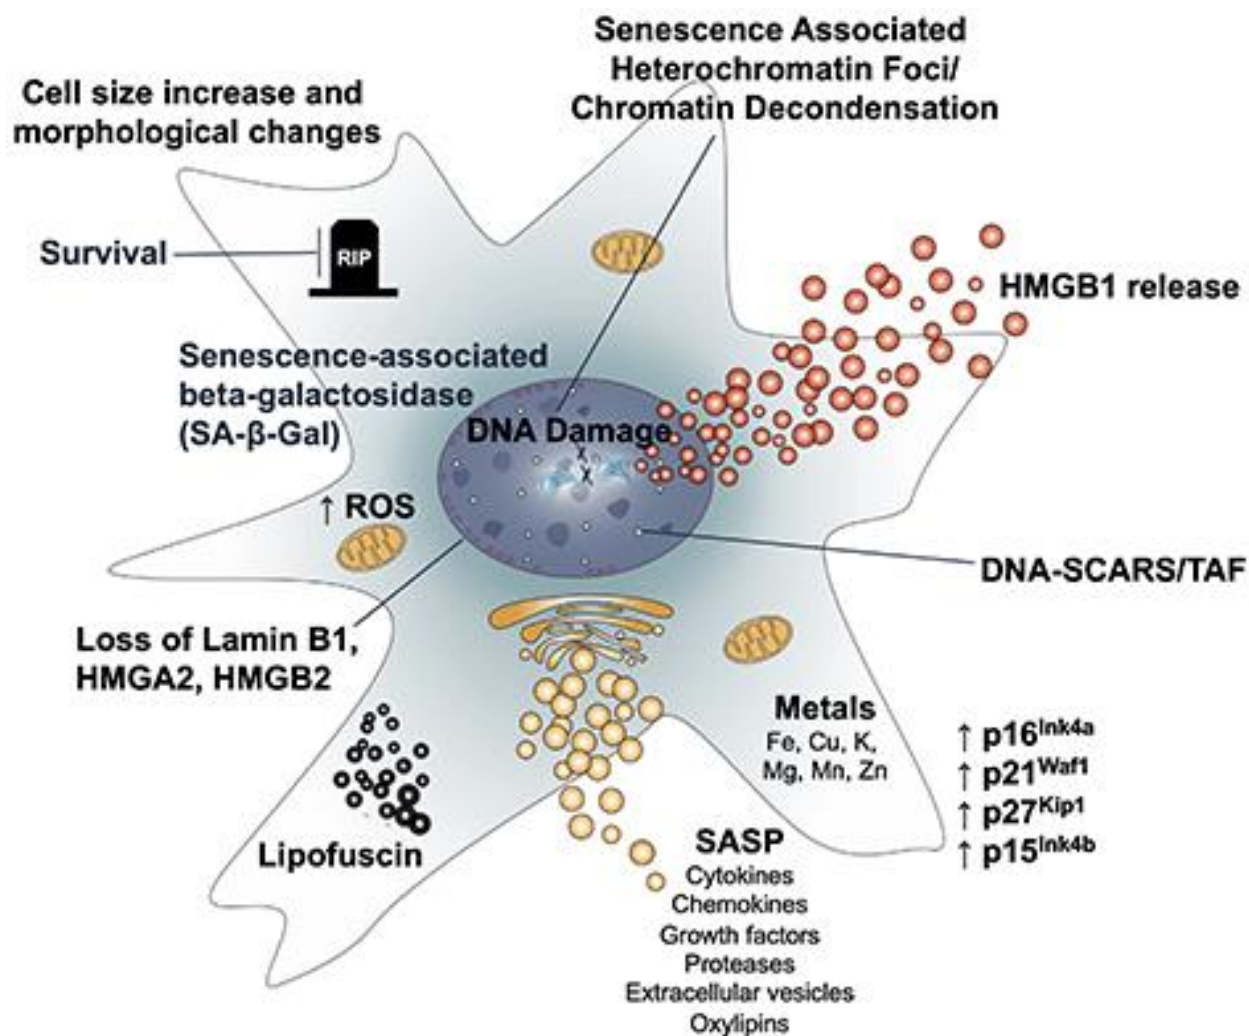

**Figure 1. Features of cellular senescence.** Senescence is accompanied by multiple features that are both functionally important and can also be used as biomarkers. These include (clockwise): 1. Senescence-associated beta-galactosidase and other lysosomal glycosidases. 2. Persistent cell survival. 3. Increased cell size and a flattened morphology. 4. Epigenetic changes including heterochromatin foci, chromatin decondensation, release of HMGB1, and persistent DNA damage foci (DNA-SCARS), including telomere-associated foci (TAF). 5. Increased cyclin-dependent kinase inhibitors, such as p16, p21, p27, or p15. 6. Accumulation of metals. 7. The SASP, consisting of hundreds of secreted molecules that include inflammatory cytokines and chemokines, growth factors, proteases, extracellular vesicles, and oxylipins. 8. Accumulation of lipofuscin. 9. Nuclear changes, including loss of Lamin B1 and HMGB2. 10. Mitochondrial expansion and dysfunction, including increased mitochondrial mass, ROS, and release of mitochondrial DNA into the cytosol.

## AUTHOR CONTRIBUTIONS

CK and CW conceived of the concepts in and wrote the manuscript. CK created the Figure and Table with guidance from CW.

## ACKNOWLEDGEMENTS

The authors thank Judith Campisi for guidance and mentorship that led to this manuscript. The content of this manuscript is the sole responsibility of the authors and does not necessarily represent the official views of the USDA.

## CONFLICTS OF INTEREST

CW is an inventor on patents related to the detection and elimination of senescent cells. CK declares no conflicts of interest.

## FUNDING

This work is supported USDA-ARS cooperative agreement 58-8050-9-004. CK was supported by a fellowship from the Tufts IRACDA program NIGMS 5K12GM133314 (PI: Mitch McVey).

## REFERENCES

1. Carrel A, Ebeling AH. AGE AND MULTIPLICATION OF FIBROBLASTS. *J Exp Med.* 1921; 34:599–623.  
<https://doi.org/10.1084/jem.34.6.599> PMID:19868581
2. Witkowski JA. Dr. Carrel's immortal cells. *Med Hist.* 1980; 24:129–42.  
<https://doi.org/10.1017/s0025727300040126> PMID:6990125
3. Hayflick L. The illusion of cell immortality. *Br J Cancer.* 2000; 83:841–6.  
<https://doi.org/10.1054/bjoc.2000.1296> PMID:10970682
4. Hayflick L, Moorhead PS. The serial cultivation of human diploid cell strains. *Exp Cell Res.* 1961; 25:585–621.  
[https://doi.org/10.1016/0014-4827\(61\)90192-6](https://doi.org/10.1016/0014-4827(61)90192-6) PMID:13905658
5. Hayflick L. THE LIMITED *IN VITRO* LIFETIME OF HUMAN DIPLOID CELL STRAINS. *Exp Cell Res.* 1965; 37:614–36.  
[https://doi.org/10.1016/0014-4827\(65\)90211-9](https://doi.org/10.1016/0014-4827(65)90211-9) PMID:14315085
6. Dimri GP, Lee X, Basile G, Acosta M, Scott G, Roskelley C, Medrano EE, Linskens M, Rubelj I, Pereira-Smith O. A biomarker that identifies senescent human cells in culture and in aging skin *in vivo*. *Proc Natl Acad Sci USA.* 1995; 92:9363–7.  
<https://doi.org/10.1073/pnas.92.20.9363> PMID:7568133
7. Bodnar AG, Ouellette M, Frolkis M, Holt SE, Chiu CP, Morin GB, Harley CB, Shay JW, Lichtsteiner S, Wright WE. Extension of life-span by introduction of telomerase into normal human cells. *Science.* 1998; 279:349–52.  
<https://doi.org/10.1126/science.279.5349.349> PMID:9454332
8. d'Adda di Fagagna F. Living on a break: cellular senescence as a DNA-damage response. *Nat Rev Cancer.* 2008; 8:512–22.  
<https://doi.org/10.1038/nrc2440> PMID:18574463
9. Serrano M, Lin AW, McCurrach ME, Beach D, Lowe SW. Oncogenic ras provokes premature cell senescence associated with accumulation of p53 and p16INK4a. *Cell.* 1997; 88:593–602.  
[https://doi.org/10.1016/s0092-8674\(00\)81902-9](https://doi.org/10.1016/s0092-8674(00)81902-9) PMID:9054499
10. Chen Q, Ames BN. Senescence-like growth arrest induced by hydrogen peroxide in human diploid fibroblast F65 cells. *Proc Natl Acad Sci USA.* 1994; 91:4130–4.  
<https://doi.org/10.1073/pnas.91.10.4130> PMID:8183882
11. Wiley CD, Velarde MC, Lecot P, Liu S, Sarnoski EA, Freund A, Shirakawa K, Lim HW, Davis SS, Ramanathan A, Gerencser AA, Verdin E, Campisi J. Mitochondrial Dysfunction Induces Senescence with a Distinct Secretory Phenotype. *Cell Metab.* 2016; 23:303–14.  
<https://doi.org/10.1016/j.cmet.2015.11.011> PMID:26686024
12. Efeyan A, Ortega-Molina A, Velasco-Miguel S, Herranz D, Vassilev LT, Serrano M. Induction of p53-dependent senescence by the MDM2 antagonist nutlin-3a in mouse cells of fibroblast origin. *Cancer Res.* 2007; 67:7350–7.  
<https://doi.org/10.1158/0008-5472.CAN-07-0200> PMID:17671205
13. Wang B, Varela-Eirin M, Brandenburg SM, Hernandez-Segura A, van Vliet T, Jongbloed EM, Wilting SM, Ohtani N, Jager A, Demaria M. Pharmacological CDK4/6 inhibition reveals a p53-dependent senescent state with restricted toxicity. *EMBO J.* 2022; 41:e108946.  
<https://doi.org/10.15252/embj.2021108946> PMID:34985783
14. Wang C, Vegna S, Jin H, Benedict B, Lieftink C, Ramirez C, de Oliveira RL, Morris B, Gadiot J, Wang W, du Chatinier A, Wang L, Gao D, et al. Inducing and exploiting vulnerabilities for the treatment of liver cancer. *Nature.* 2019; 574:268–72.  
<https://doi.org/10.1038/s41586-019-1607-3> PMID:31578521

15. Neurohr GE, Terry RL, Lengefeld J, Bonney M, Brittingham GP, Moretto F, Miettinen TP, Vaites LP, Soares LM, Paulo JA, Harper JW, Buratowski S, Manalis S, et al. Excessive Cell Growth Causes Cytoplasm Dilution And Contributes to Senescence. *Cell*. 2019; 176:1083–97.e18.  
<https://doi.org/10.1016/j.cell.2019.01.018>  
PMID:[30739799](https://pubmed.ncbi.nlm.nih.gov/30739799/)
16. Ogrodnik M, Carlos Acosta J, Adams PD, d'Adda di Fagagna F, Baker DJ, Bishop CL, Chandra T, Collado M, Gil J, Gorgoulis V, Gruber F, Hara E, Jansen-Dürr P, et al. Guidelines for minimal information on cellular senescence experimentation *in vivo*. *Cell*. 2024; 187:4150–75.  
<https://doi.org/10.1016/j.cell.2024.05.059>  
PMID:[39121846](https://pubmed.ncbi.nlm.nih.gov/39121846/)
17. Gorgoulis V, Adams PD, Alimonti A, Bennett DC, Bischof O, Bishop C, Campisi J, Collado M, Evangelou K, Ferbeyre G, Gil J, Hara E, Krizhanovsky V, et al. Cellular Senescence: Defining a Path Forward. *Cell*. 2019; 179:813–27.  
<https://doi.org/10.1016/j.cell.2019.10.005>  
PMID:[31675495](https://pubmed.ncbi.nlm.nih.gov/31675495/)
18. López-Domínguez JA, Rodríguez-López S, Ahumada-Castro U, Desprez PY, Konovalenko M, Laberge RM, Cárdenas C, Villalba JM, Campisi J. Cdkn1a transcript variant 2 is a marker of aging and cellular senescence. *Aging (Albany NY)*. 2021; 13:13380–92.  
<https://doi.org/10.18632/aging.203110>  
PMID:[34035185](https://pubmed.ncbi.nlm.nih.gov/34035185/)
19. Wang F, Zhang L. p15(INK4b) regulates cell cycle signaling in hippocampal astrocytes of aged rats. *Aging Clin Exp Res*. 2016; 28:813–21.  
<https://doi.org/10.1007/s40520-015-0484-3>  
PMID:[26526028](https://pubmed.ncbi.nlm.nih.gov/26526028/)
20. Menthena A, Koehler CI, Sandhu JS, Yovchev MI, Hurston E, Shafritz DA, Oertel M. Activin A, p15INK4b signaling, and cell competition promote stem/progenitor cell repopulation of livers in aging rats. *Gastroenterology*. 2011; 140:1009–20.  
<https://doi.org/10.1053/j.gastro.2010.12.003>  
PMID:[21147108](https://pubmed.ncbi.nlm.nih.gov/21147108/)
21. Chkhotua AB, Gabusi E, Altimari A, D'Errico A, Yakubovich M, Vienken J, Stefoni S, Chieco P, Yussim A, Grigioni WF. Increased expression of p16(INK4a) and p27(Kip1) cyclin-dependent kinase inhibitor genes in aging human kidney and chronic allograft nephropathy. *Am J Kidney Dis*. 2003; 41:1303–13.  
[https://doi.org/10.1016/s0272-6386\(03\)00363-9](https://doi.org/10.1016/s0272-6386(03)00363-9)  
PMID:[12776284](https://pubmed.ncbi.nlm.nih.gov/12776284/)
22. Baker DJ, Childs BG, Durik M, Wijers ME, Sieben CJ, Zhong J, Saltness RA, Jeganathan KB, Verzosa GC, Pezeshki A, Khazaie K, Miller JD, van Deursen JM. Naturally occurring p16(Ink4a)-positive cells shorten healthy lifespan. *Nature*. 2016; 530:184–9.  
<https://doi.org/10.1038/nature16932>  
PMID:[26840489](https://pubmed.ncbi.nlm.nih.gov/26840489/)
23. Demaria M, Ohtani N, Youssef SA, Rodier F, Toussaint W, Mitchell JR, Laberge RM, Vijg J, Van Steeg H, Dollé ME, Hoeijmakers JH, de Bruin A, Hara E, Campisi J. An essential role for senescent cells in optimal wound healing through secretion of PDGF-AA. *Dev Cell*. 2014; 31:722–33.  
<https://doi.org/10.1016/j.devcel.2014.11.012>  
PMID:[25499914](https://pubmed.ncbi.nlm.nih.gov/25499914/)
24. Wang B, Wang L, Gasek NS, Kuo CL, Nie J, Kim T, Yan P, Zhu J, Torrance BL, Zhou Y, Flores LC, Allen C, Andrade AM, et al. Intermittent clearance of p21-highly-expressing cells extends lifespan and confers sustained benefits to health and physical function. *Cell Metab*. 2024; 36:1795–805.e6.  
<https://doi.org/10.1016/j.cmet.2024.07.006>  
PMID:[39111286](https://pubmed.ncbi.nlm.nih.gov/39111286/)
25. Hall BM, Balan V, Gleiberman AS, Strom E, Krasnov P, Virtuoso LP, Rydkina E, Vujcic S, Balan K, Gitlin I, Leonova K, Polinsky A, Chernova OB, Gudkov AV. Aging of mice is associated with p16(Ink4a)- and  $\beta$ -galactosidase-positive macrophage accumulation that can be induced in young mice by senescent cells. *Aging (Albany NY)*. 2016; 8:1294–315.  
<https://doi.org/10.18632/aging.100991>  
PMID:[27391570](https://pubmed.ncbi.nlm.nih.gov/27391570/)
26. Hall BM, Balan V, Gleiberman AS, Strom E, Krasnov P, Virtuoso LP, Rydkina E, Vujcic S, Balan K, Gitlin II, Leonova KI, Consiglio CR, Gollnick SO, et al. p16(Ink4a) and senescence-associated  $\beta$ -galactosidase can be induced in macrophages as part of a reversible response to physiological stimuli. *Aging (Albany NY)*. 2017; 9:1867–84.  
<https://doi.org/10.18632/aging.101268>  
PMID:[28768895](https://pubmed.ncbi.nlm.nih.gov/28768895/)
27. Liu JY, Souroullas GP, Diekman BO, Krishnamurthy J, Hall BM, Sorrentino JA, Parker JS, Sessions GA, Gudkov AV, Sharpless NE. Cells exhibiting strong p16<sup>INK4a</sup> promoter activation *in vivo* display features of senescence. *Proc Natl Acad Sci U S A*. 2019; 116:2603–11.  
<https://doi.org/10.1073/pnas.1818313116>  
PMID:[30683717](https://pubmed.ncbi.nlm.nih.gov/30683717/)
28. Li Y, Nichols MA, Shay JW, Xiong Y. Transcriptional repression of the D-type cyclin-dependent kinase inhibitor p16 by the retinoblastoma susceptibility gene product pRb. *Cancer Res*. 1994; 54:6078–82.  
PMID:[7954450](https://pubmed.ncbi.nlm.nih.gov/7954450/)
29. Coller HA, Sang L, Roberts JM. A new description of cellular quiescence. *PLoS Biol*. 2006; 4:e83.

- <https://doi.org/10.1371/journal.pbio.0040083>  
PMID:16509772
30. Ko RM, Kim HG, Wolff L, Klug CA. Roles of p15Ink4b and p16Ink4a in myeloid differentiation and RUNX1-ETO-associated acute myeloid leukemia. *Leuk Res.* 2008; 32:1101–11.  
<https://doi.org/10.1016/j.leukres.2007.10.012>  
PMID:18037485
31. Humeniuk R, Rosu-Myles M, Fares J, Koller R, Bies J, Wolff L. The role of tumor suppressor p15Ink4b in the regulation of hematopoietic progenitor cell fate. *Blood Cancer J.* 2013; 3:e99.  
<https://doi.org/10.1038/bcj.2012.44> PMID:23359317
32. Hsu CH, Altschuler SJ, Wu LF. Patterns of Early p21 Dynamics Determine Proliferation-Senescence Cell Fate after Chemotherapy. *Cell.* 2019; 178:361–73.e12.  
<https://doi.org/10.1016/j.cell.2019.05.041>  
PMID:31204100
33. Marescal O, Cheeseman IM. Cellular Mechanisms and Regulation of Quiescence. *Dev Cell.* 2020; 55:259–71.  
<https://doi.org/10.1016/j.devcel.2020.09.029>  
PMID:33171109
34. Dirac AM, Bernards R. Reversal of senescence in mouse fibroblasts through lentiviral suppression of p53. *J Biol Chem.* 2003; 278:11731–4.  
<https://doi.org/10.1074/jbc.C300023200>  
PMID:12551891
35. Beauséjour CM, Krtolica A, Galimi F, Narita M, Lowe SW, Yaswen P, Campisi J. Reversal of human cellular senescence: roles of the p53 and p16 pathways. *EMBO J.* 2003; 22:4212–22.  
<https://doi.org/10.1093/emboj/cdg417>  
PMID:12912919
36. Wiley CD, Schaum N, Alimirah F, Lopez-Dominguez JA, Orjalo AV, Scott G, Desprez PY, Benz C, Davalos AR, Campisi J. Small-molecule MDM2 antagonists attenuate the senescence-associated secretory phenotype. *Sci Rep.* 2018; 8:2410.  
<https://doi.org/10.1038/s41598-018-20000-4>  
PMID:29402901
37. Kuehnemann C, Hughes JB, Desprez PY, Melov S, Wiley CD, Campisi J. Antiretroviral protease inhibitors induce features of cellular senescence that are reversible upon drug removal. *Aging Cell.* 2023; 22:e13750.  
<https://doi.org/10.1111/acer.13750> PMID:36539941
38. Lee S, Schmitt CA. The dynamic nature of senescence in cancer. *Nat Cell Biol.* 2019; 21:94–101.  
<https://doi.org/10.1038/s41556-018-0249-2>  
PMID:30602768
39. Martínez-Zamudio RI, Stefa A, Nabuco Leva Ferreira Freitas JA, Vasilopoulos T, Simpson M, Doré G, Roux PF, Galan MA, Chokshi RJ, Bischof O, Herbig U. Escape from oncogene-induced senescence is controlled by POU2F2 and memorized by chromatin scars. *Cell Genom.* 2023; 3:100293.  
<https://doi.org/10.1016/j.xgen.2023.100293>  
PMID:37082139
40. Fleury H, Malaquin N, Tu V, Gilbert S, Martinez A, Olivier MA, Sauriol SA, Communal L, Leclerc-Desaulniers K, Carmona E, Provencher D, Mes-Masson AM, Rodier F. Exploiting interconnected synthetic lethal interactions between PARP inhibition and cancer cell reversible senescence. *Nat Commun.* 2019; 10:2556.  
<https://doi.org/10.1038/s41467-019-10460-1>  
PMID:31186408
41. Milanovic M, Fan DN, Belenki D, Däbritz JH, Zhao Z, Yu Y, Dörr JR, Dimitrova L, Lenze D, Monteiro Barbosa IA, Mendoza-Parra MA, Kanashova T, Metzner M, et al. Senescence-associated reprogramming promotes cancer stemness. *Nature.* 2018; 553:96–100.  
<https://doi.org/10.1038/nature25167> PMID:29258294
42. Zampetidis CP, Galanos P, Angelopoulou A, Zhu Y, Polyzou A, Karamitros T, Kotsinas A, Lagopati N, Mourkioti I, Mirzazadeh R, Polyzos A, Garnerone S, Mizi A, et al. A recurrent chromosomal inversion suffices for driving escape from oncogene-induced senescence via subTAD reorganization. *Mol Cell.* 2021; 81:4907–23.e8.  
<https://doi.org/10.1016/j.molcel.2021.10.017>  
PMID:34793711
43. Evangelou K, Belogiannis K, Papaspyropoulos A, Petty R, Gorgoulis VG. Escape from senescence: molecular basis and therapeutic ramifications. *J Pathol.* 2023; 260:649–65.  
<https://doi.org/10.1002/path.6164>  
PMID:37550877
44. Lee BY, Han JA, Im JS, Morrone A, Johung K, Goodwin EC, Kleijer WJ, DiMaio D, Hwang ES. Senescence-associated beta-galactosidase is lysosomal beta-galactosidase. *Aging Cell.* 2006; 5:187–95.  
<https://doi.org/10.1111/j.1474-9726.2006.00199.x>  
PMID:16626397
45. Sun J, Wang M, Zhong Y, Ma X, Sun S, Xu C, Peng L, Li G, Zhang L, Liu Z, Ai D, Liu B. A Glb1-2A-mCherry reporter monitors systemic aging and predicts lifespan in middle-aged mice. *Nat Commun.* 2022; 13:7028.  
<https://doi.org/10.1038/s41467-022-34801-9>  
PMID:36396643
46. Hildebrand DG, Lehle S, Borst A, Haferkamp S, Essmann F, Schulze-Osthoff K.  $\alpha$ -Fucosidase as a novel convenient biomarker for cellular senescence. *Cell Cycle.* 2013; 12:1922–7.  
<https://doi.org/10.4161/cc.24944>  
PMID:23673343

47. Casella G, Munk R, Kim KM, Piao Y, De S, Abdelmohsen K, Gorospe M. Transcriptome signature of cellular senescence. *Nucleic Acids Res.* 2019; 47:11476. <https://doi.org/10.1093/nar/gkz879> PMID:31612919
48. Johmura Y, Yamanaka T, Omori S, Wang TW, Sugiura Y, Matsumoto M, Suzuki N, Kumamoto S, Yamaguchi K, Hatakeyama S, Takami T, Yamaguchi R, Shimizu E, et al. Senolysis by glutaminolysis inhibition ameliorates various age-associated disorders. *Science.* 2021; 371:265–70. <https://doi.org/10.1126/science.abb5916> PMID:33446552
49. Campisi J. Replicative senescence: an old lives' tale? *Cell.* 1996; 84:497–500. [https://doi.org/10.1016/s0092-8674\(00\)81023-5](https://doi.org/10.1016/s0092-8674(00)81023-5) PMID:8598035
50. Shay JW, Wright WE. Hayflick, his limit, and cellular ageing. *Nat Rev Mol Cell Biol.* 2000; 1:72–6. <https://doi.org/10.1038/35036093> PMID:11413492
51. Krtolica A, Parrinello S, Lockett S, Desprez PY, Campisi J. Senescent fibroblasts promote epithelial cell growth and tumorigenesis: a link between cancer and aging. *Proc Natl Acad Sci USA.* 2001; 98:12072–7. <https://doi.org/10.1073/pnas.211053698> PMID:11593017
52. Coppé JP, Patil CK, Rodier F, Sun Y, Muñoz DP, Goldstein J, Nelson PS, Desprez PY, Campisi J. Senescence-associated secretory phenotypes reveal cell-nonautonomous functions of oncogenic RAS and the p53 tumor suppressor. *PLoS Biol.* 2008; 6:2853–68. <https://doi.org/10.1371/journal.pbio.0060301> PMID:19053174
53. Acosta JC, O'Loughlen A, Banito A, Guijarro MV, Augert A, Raguz S, Fumagalli M, Da Costa M, Brown C, Popov N, Takatsu Y, Melamed J, d'Adda di Fagagna F, et al. Chemokine signaling via the CXCR2 receptor reinforces senescence. *Cell.* 2008; 133:1006–18. <https://doi.org/10.1016/j.cell.2008.03.038> PMID:18555777
54. Kuilman T, Michaloglou C, Vredeveld LC, Douma S, van Doorn R, Desmet CJ, Aarden LA, Mooi WJ, Peeper DS. Oncogene-induced senescence relayed by an interleukin-dependent inflammatory network. *Cell.* 2008; 133:1019–31. <https://doi.org/10.1016/j.cell.2008.03.039> PMID:18555778
55. Freund A, Patil CK, Campisi J. p38MAPK is a novel DNA damage response-independent regulator of the senescence-associated secretory phenotype. *EMBO J.* 2011; 30:1536–48. <https://doi.org/10.1038/emboj.2011.69> PMID:21399611
56. De Cecco M, Ito T, Petrashen AP, Elias AE, Skvir NJ, Criscione SW, Caligiana A, Broccoli G, Adney EM, Boeke JD, Le O, Beauséjour C, Ambati J, et al. L1 drives IFN in senescent cells and promotes age-associated inflammation. *Nature.* 2019; 566:73–8. <https://doi.org/10.1038/s41586-018-0784-9> PMID:30728521  
Erratum in: *Nature.* 2019; 572:E5. <https://doi.org/10.1038/s41586-019-1350-9> PMID:31296937
57. Dou Z, Ghosh K, Vizioli MG, Zhu J, Sen P, Wangenstein KJ, Simithy J, Lan Y, Lin Y, Zhou Z, Capell BC, Xu C, Xu M, et al. Cytoplasmic chromatin triggers inflammation in senescence and cancer. *Nature.* 2017; 550:402–6. <https://doi.org/10.1038/nature24050> PMID:28976970
58. Victorelli S, Salmonowicz H, Chapman J, Martini H, Vizioli MG, Riley JS, Cloix C, Hall-Younger E, Machado Espindola-Netto J, Jurk D, Lagnado AB, Sales Gomez L, Farr JN, et al. Apoptotic stress causes mtDNA release during senescence and drives the SASP. *Nature.* 2023; 622:627–36. <https://doi.org/10.1038/s41586-023-06621-4> PMID:37821702
59. Franceschi C, Campisi J. Chronic inflammation (inflammaging) and its potential contribution to age-associated diseases. *J Gerontol A Biol Sci Med Sci.* 2014; 69:S4–9. <https://doi.org/10.1093/gerona/glu057> PMID:24833586
60. Basisty N, Kale A, Jeon OH, Kuehnemann C, Payne T, Rao C, Holtz A, Shah S, Sharma V, Ferrucci L, Campisi J, Schilling B. A proteomic atlas of senescence-associated secretomes for aging biomarker development. *PLoS Biol.* 2020; 18:e3000599. <https://doi.org/10.1371/journal.pbio.3000599> PMID:31945054
61. Schafer MJ, White TA, Iijima K, Haak AJ, Ligresti G, Atkinson EJ, Oberg AL, Birch J, Salmonowicz H, Zhu Y, Mazula DL, Brooks RW, Fuhrmann-Stroissnigg H, et al. Cellular senescence mediates fibrotic pulmonary disease. *Nat Commun.* 2017; 8:14532. <https://doi.org/10.1038/ncomms14532> PMID:28230051
62. Wiley CD, Liu S, Limbad C, Zawadzka AM, Beck J, Demaria M, Artwood R, Alimirah F, Lopez-Dominguez JA, Kuehnemann C, Danielson SR, Basisty N, Kasler HG, et al. SILAC Analysis Reveals Increased Secretion of Hemostasis-Related Factors by Senescent Cells. *Cell Rep.* 2019; 28:3329–37.e5. <https://doi.org/10.1016/j.celrep.2019.08.049> PMID:31553904

63. Meng Q, Chen C, Yang N, Gololobova O, Shi C, Dunn CA, Rossi M, Martindale JL, Basisty N, Ding J, Delannoy M, Basu S, Mazan-Mamczarz K, et al. Surfaceome analysis of extracellular vesicles from senescent cells uncovers uptake repressor DPP4. *Proc Natl Acad Sci USA*. 2023; 120:e2219801120.  
<https://doi.org/10.1073/pnas.2219801120>  
PMID:[37862381](https://pubmed.ncbi.nlm.nih.gov/37862381/)
64. Jeon OH, Wilson DR, Clement CC, Rathod S, Cherry C, Powell B, Lee Z, Khalil AM, Green JJ, Campisi J, Santambrogio L, Witwer KW, Elisseff JH. Senescence cell-associated extracellular vesicles serve as osteoarthritis disease and therapeutic markers. *JCI Insight*. 2019; 4:e125019.  
<https://doi.org/10.1172/jci.insight.125019>  
PMID:[30944259](https://pubmed.ncbi.nlm.nih.gov/30944259/)
65. Takasugi M, Okada R, Takahashi A, Virya Chen D, Watanabe S, Hara E. Small extracellular vesicles secreted from senescent cells promote cancer cell proliferation through EphA2. *Nat Commun*. 2017; 8:15729.  
<https://doi.org/10.1038/ncomms15728>  
PMID:[28585531](https://pubmed.ncbi.nlm.nih.gov/28585531/)
66. Borghesan M, Fafián-Labora J, Eleftheriadou O, Carpintero-Fernández P, Paez-Ribes M, Vizcay-Barrena G, Swisa A, Kolodkin-Gal D, Ximénez-Embún P, Lowe R, Martín-Martín B, Peinado H, Muñoz J, et al. Small Extracellular Vesicles Are Key Regulators of Non-cell Autonomous Intercellular Communication in Senescence via the Interferon Protein IFITM3. *Cell Rep*. 2019; 27:3956–71.e6.  
<https://doi.org/10.1016/j.celrep.2019.05.095>  
PMID:[31242426](https://pubmed.ncbi.nlm.nih.gov/31242426/)
67. Patel SK, Bons J, Rose JP, Chappel JR, Beres RL, Watson MA, Webster C, Burton JB, Bruderer R, Desprez PY, Reiter L, Campisi J, Baker ES, Schilling B. Exosomes released from senescent cells and circulatory exosomes isolated from human plasma reveal aging-associated proteomic and lipid signatures. *Aging (Albany NY)*. 2025; 17:1929–65.  
<https://doi.org/10.18632/aging.206292>  
PMID:[40748658](https://pubmed.ncbi.nlm.nih.gov/40748658/)
68. Li J, Tan J, Song Q, Yang X, Zhang X, Qin H, Huang G, Su X, Li J. Exosomal miR-767 from senescent endothelial-derived accelerating skin fibroblasts aging via inhibiting TAB1. *J Mol Histol*. 2023; 54:13–24.  
<https://doi.org/10.1007/s10735-022-10107-4>  
PMID:[36409439](https://pubmed.ncbi.nlm.nih.gov/36409439/)
69. Lee AH, Ghosh D, Koh IL, Dawson MR. Senescence-associated exosomes transfer miRNA-induced fibrosis to neighboring cells. *Aging (Albany NY)*. 2023; 15:1237–56.  
<https://doi.org/10.18632/aging.204539>  
PMID:[36842089](https://pubmed.ncbi.nlm.nih.gov/36842089/)
70. Wiley CD, Sharma R, Davis SS, Lopez-Dominguez JA, Mitchell KP, Wiley S, Alimirah F, Kim DE, Payne T, Rosko A, Aimontche E, Deshpande SM, Neri F, et al. Oxylin biosynthesis reinforces cellular senescence and allows detection of senolysis. *Cell Metab*. 2021; 33:1124–36.e5.  
<https://doi.org/10.1016/j.cmet.2021.03.008>  
PMID:[33811820](https://pubmed.ncbi.nlm.nih.gov/33811820/)
71. Wiley CD, Brumwell AN, Davis SS, Jackson JR, Valdovinos A, Calhoun C, Alimirah F, Castellanos CA, Ruan R, Wei Y, Chapman HA, Ramanathan A, Campisi J, Jourdan Le Saux C. Secretion of leukotrienes by senescent lung fibroblasts promotes pulmonary fibrosis. *JCI Insight*. 2019; 4:e130056.  
<https://doi.org/10.1172/jci.insight.130056>  
PMID:[31687975](https://pubmed.ncbi.nlm.nih.gov/31687975/)
72. Davalos AR, Kawahara M, Malhotra GK, Schaum N, Huang J, Ved U, Beausejour CM, Coppe JP, Rodier F, Campisi J. p53-dependent release of Alarmin HMGB1 is a central mediator of senescent phenotypes. *J Cell Biol*. 2013; 201:613–29.  
<https://doi.org/10.1083/jcb.201206006>  
PMID:[23649808](https://pubmed.ncbi.nlm.nih.gov/23649808/)
73. Chen R, Kang R, Tang D. The mechanism of HMGB1 secretion and release. *Exp Mol Med*. 2022; 54:91–102.  
<https://doi.org/10.1038/s12276-022-00736-w>  
PMID:[35217834](https://pubmed.ncbi.nlm.nih.gov/35217834/)
74. Parry AJ, Hoare M, Bihary D, Hänsel-Hertsch R, Smith S, Tomimatsu K, Mannion E, Smith A, D'Santos P, Russell IA, Balasubramanian S, Kimura H, Samarajiwa SA, Narita M. NOTCH-mediated non-cell autonomous regulation of chromatin structure during senescence. *Nat Commun*. 2018; 9:1840.  
<https://doi.org/10.1038/s41467-018-04283-9>  
PMID:[29743479](https://pubmed.ncbi.nlm.nih.gov/29743479/)
75. Acosta JC, Banito A, Wuestefeld T, Georgilis A, Janich P, Morton JP, Athineos D, Kang TW, Lasitschka F, Andrusil M, Pascual G, Morris KJ, Khan S, et al. A complex secretory program orchestrated by the inflammasome controls paracrine senescence. *Nat Cell Biol*. 2013; 15:978–90.  
<https://doi.org/10.1038/ncb2784>  
PMID:[23770676](https://pubmed.ncbi.nlm.nih.gov/23770676/)
76. Rovira M, Sereda R, Pladevall-Morera D, Ramponi V, Marin I, Maus M, Madrigal-Matute J, Díaz A, García F, Muñoz J, Cuervo AM, Serrano M. The lysosomal proteome of senescent cells contributes to the senescence secretome. *Aging Cell*. 2022; 21:e13707.  
<https://doi.org/10.1111/accel.13707>  
PMID:[36087066](https://pubmed.ncbi.nlm.nih.gov/36087066/)

77. Tao W, Yu Z, Han JJ. Single-cell senescence identification reveals senescence heterogeneity, trajectory, and modulators. *Cell Metab.* 2024; 36:1126–43.e5.  
<https://doi.org/10.1016/j.cmet.2024.03.009>  
PMID:38604170
78. Cohn RL, Gasek NS, Kuchel GA, Xu M. The heterogeneity of cellular senescence: insights at the single-cell level. *Trends Cell Biol.* 2023; 33:9–17.  
<https://doi.org/10.1016/j.tcb.2022.04.011>  
PMID:35599179
79. Uyar B, Palmer D, Kowald A, Murua Escobar H, Barrantes I, Möller S, Akalin A, Fuellen G. Single-cell analyses of aging, inflammation and senescence. *Ageing Res Rev.* 2020; 64:101156.  
<https://doi.org/10.1016/j.arr.2020.101156>  
PMID:32949770
80. Hernandez-Segura A, de Jong TV, Melov S, Guryev V, Campisi J, Demaria M. Unmasking Transcriptional Heterogeneity in Senescent Cells. *Curr Biol.* 2017; 27:2652–60.e4.  
<https://doi.org/10.1016/j.cub.2017.07.033>  
PMID:28844647
81. Freund A, Laberge RM, Demaria M, Campisi J. Lamin B1 loss is a senescence-associated biomarker. *Mol Biol Cell.* 2012; 23:2066–75.  
<https://doi.org/10.1091/mbc.E11-10-0884>  
PMID:22496421
82. Gasior SL, Wakeman TP, Xu B, Deininger PL. The human LINE-1 retrotransposon creates DNA double-strand breaks. *J Mol Biol.* 2006; 357:1383–93.  
<https://doi.org/10.1016/j.jmb.2006.01.089>  
PMID:16490214
83. Aird KM, Iwasaki O, Kossenkov AV, Tanizawa H, Fatkhutdinov N, Bitler BG, Le L, Alicea G, Yang TL, Johnson FB, Noma KI, Zhang R. HMGB2 orchestrates the chromatin landscape of senescence-associated secretory phenotype gene loci. *J Cell Biol.* 2016; 215:325–34.  
<https://doi.org/10.1083/jcb.201608026>  
PMID:27799366
84. Rodier F, Coppé JP, Patil CK, Hoeijmakers WA, Muñoz DP, Raza SR, Freund A, Campeau E, Davalos AR, Campisi J. Persistent DNA damage signalling triggers senescence-associated inflammatory cytokine secretion. *Nat Cell Biol.* 2009; 11:973–9.  
<https://doi.org/10.1038/ncb1909> PMID:19597488
85. Rodier F, Muñoz DP, Teachenor R, Chu V, Le O, Bhaumik D, Coppé JP, Campeau E, Beauséjour CM, Kim SH, Davalos AR, Campisi J. DNA-SCARS: distinct nuclear structures that sustain damage-induced senescence growth arrest and inflammatory cytokine secretion. *J Cell Sci.* 2011; 124:68–81.  
<https://doi.org/10.1242/jcs.071340>  
PMID:21118958
86. Hewitt G, Jurk D, Marques FD, Correia-Melo C, Hardy T, Gackowska A, Anderson R, Taschuk M, Mann J, Passos JF. Telomeres are favoured targets of a persistent DNA damage response in ageing and stress-induced senescence. *Nat Commun.* 2012; 3:708.  
<https://doi.org/10.1038/ncomms1708> PMID:22426229
87. Fumagalli M, Rossiello F, Clerici M, Barozzi S, Cittaro D, Kaplunov JM, Bucci G, Dobrev M, Matti V, Beausejour CM, Herbig U, Longhese MP, d'Adda di Fagagna F. Telomeric DNA damage is irreparable and causes persistent DNA-damage-response activation. *Nat Cell Biol.* 2012; 14:355–65.  
<https://doi.org/10.1038/ncb2466>  
Erratum in: *Nat Cell Biol.* 2012; 14:555.  
<https://doi.org/10.1038/ncb2466>  
PMID:22426077
88. Narita M, Nunez S, Heard E, Narita M, Lin AW, Hearn SA, Spector DL, Hannon GJ, Lowe SW. Rb-mediated heterochromatin formation and silencing of E2F target genes during cellular senescence. *Cell.* 2003; 113:703–16.  
[https://doi.org/10.1016/s0092-8674\(03\)00401-x](https://doi.org/10.1016/s0092-8674(03)00401-x)  
PMID:12809602
89. Swanson EC, Manning B, Zhang H, Lawrence JB. Higher-order unfolding of satellite heterochromatin is a consistent and early event in cell senescence. *J Cell Biol.* 2013; 203:929–42.  
<https://doi.org/10.1083/jcb.201306073>  
PMID:24344186
90. Ziegler DV, Wiley CD, Velarde MC. Mitochondrial effectors of cellular senescence: beyond the free radical theory of aging. *Ageing Cell.* 2015; 14:1–7.  
<https://doi.org/10.1111/acer.12287> PMID:25399755
91. Miwa S, Kashyap S, Chini E, von Zglinicki T. Mitochondrial dysfunction in cell senescence and aging. *J Clin Invest.* 2022; 132:e158447.  
<https://doi.org/10.1172/JCI158447> PMID:35775483
92. Wiley CD, Campisi J. The metabolic roots of senescence: mechanisms and opportunities for intervention. *Nat Metab.* 2021; 3:1290–301.  
<https://doi.org/10.1038/s42255-021-00483-8>  
PMID:34663974
93. Roh K, Noh J, Kim Y, Jang Y, Kim J, Choi H, Lee Y, Ji M, Kang D, Kim MS, Paik MJ, Chung J, Kim JH, et al. Lysosomal control of senescence and inflammation through cholesterol partitioning. *Nat Metab.* 2023; 5:398–413.  
<https://doi.org/10.1038/s42255-023-00747-5>  
PMID:36864206
94. Ivanov A, Pawlikowski J, Manoharan I, van Tuyn J, Nelson DM, Rai TS, Shah PP, Hewitt G, Korolchuk VI,

- Passos JF, Wu H, Berger SL, Adams PD. Lysosome-mediated processing of chromatin in senescence. *J Cell Biol.* 2013; 202:129–43.  
<https://doi.org/10.1083/jcb.201212110>  
PMID:[23816621](https://pubmed.ncbi.nlm.nih.gov/23816621/)
95. Tan JX, Finkel T. Lysosomes in senescence and aging. *EMBO Rep.* 2023; 24:e57265.  
<https://doi.org/10.15252/embr.202357265>  
PMID:[37811693](https://pubmed.ncbi.nlm.nih.gov/37811693/)
96. Kang HT, Lee KB, Kim SY, Choi HR, Park SC. Autophagy impairment induces premature senescence in primary human fibroblasts. *PLoS One.* 2011; 6:e23367.  
<https://doi.org/10.1371/journal.pone.0023367>  
PMID:[21858089](https://pubmed.ncbi.nlm.nih.gov/21858089/)
97. Wang H, Muthu Karuppan MK, Devadoss D, Nair M, Chand HS, Lakshmana MK. TFEB protein expression is reduced in aged brains and its overexpression mitigates senescence-associated biomarkers and memory deficits in mice. *Neurobiol Aging.* 2021; 106:26–36.  
<https://doi.org/10.1016/j.neurobiolaging.2021.06.003>  
PMID:[34229273](https://pubmed.ncbi.nlm.nih.gov/34229273/)
98. Killilea DW, Atamna H, Liao C, Ames BN. Iron accumulation during cellular senescence in human fibroblasts *in vitro*. *Antioxid Redox Signal.* 2003; 5:507–16.  
<https://doi.org/10.1089/152308603770310158>  
PMID:[14580305](https://pubmed.ncbi.nlm.nih.gov/14580305/)
99. Killilea DW, Wong SL, Cahaya HS, Atamna H, Ames BN. Iron accumulation during cellular senescence. *Ann N Y Acad Sci.* 2004; 1019:365–7.  
<https://doi.org/10.1196/annals.1297.063>  
PMID:[15247045](https://pubmed.ncbi.nlm.nih.gov/15247045/)
100. Masaldan S, Clatworthy SA, Gamell C, Meggyesy PM, Rigopoulos AT, Haupt S, Haupt Y, Denoyer D, Adlard PA, Bush AI, Cater MA. Iron accumulation in senescent cells is coupled with impaired ferritinophagy and inhibition of ferroptosis. *Redox Biol.* 2018; 14:100–15.  
<https://doi.org/10.1016/j.redox.2017.08.015>  
PMID:[28888202](https://pubmed.ncbi.nlm.nih.gov/28888202/)
101. Masaldan S, Clatworthy SAS, Gamell C, Smith ZM, Francis PS, Denoyer D, Meggyesy PM, Fontaine S, Cater MA. Copper accumulation in senescent cells: Interplay between copper transporters and impaired autophagy. *Redox Biol.* 2018; 16:322–31.  
<https://doi.org/10.1016/j.redox.2018.03.007>  
PMID:[29579719](https://pubmed.ncbi.nlm.nih.gov/29579719/)
102. Maus M, López-Polo V, Mateo L, Lafarga M, Aguilera M, De Lama E, Meyer K, Sola A, Lopez-Martinez C, López-Alonso I, Guasch-Piqueras M, Hernandez-Gonzalez F, Chaib S, et al. Iron accumulation drives fibrosis, senescence and the senescence-associated secretory phenotype. *Nat Metab.* 2023; 5:2111–30.  
<https://doi.org/10.1038/s42255-023-00928-2>  
PMID:[38097808](https://pubmed.ncbi.nlm.nih.gov/38097808/)
103. Admasu TD, Kim K, Rae M, Avelar R, Gonciarz RL, Rebbaa A, Pedro de Magalhães J, Renslo AR, Stolzing A, Sharma A. Selective ablation of primary and paracrine senescent cells by targeting iron dyshomeostasis. *Cell Rep.* 2023; 42:112058.  
<https://doi.org/10.1016/j.celrep.2023.112058>  
PMID:[36753419](https://pubmed.ncbi.nlm.nih.gov/36753419/)
104. Du K, Umbaugh DS, Wang L, Jun JH, Dutta RK, Oh SH, Ren N, Zhang Q, Ko DC, Ferreira A, Hill J, Gao G, Pullen SS, et al. Targeting senescent hepatocytes for treatment of metabolic dysfunction-associated steatotic liver disease and multi-organ dysfunction. *Nat Commun.* 2025; 16:3038.  
<https://doi.org/10.1038/s41467-025-57616-w>  
PMID:[40155379](https://pubmed.ncbi.nlm.nih.gov/40155379/)
105. Terman A, Brunk UT. Lipofuscin. *Int J Biochem Cell Biol.* 2004; 36:1400–4.  
<https://doi.org/10.1016/j.biocel.2003.08.009>  
PMID:[15147719](https://pubmed.ncbi.nlm.nih.gov/15147719/)
106. Gray DA, Woulfe J. Lipofuscin and aging: a matter of toxic waste. *Sci Aging Knowledge Environ.* 2005; 2005:re1.  
<https://doi.org/10.1126/sageke.2005.5.re1>  
PMID:[15689603](https://pubmed.ncbi.nlm.nih.gov/15689603/)
107. Terman A, Brunk UT. Lipofuscin: mechanisms of formation and increase with age. *APMIS.* 1998; 106:265–76.  
<https://doi.org/10.1111/j.1699-0463.1998.tb01346.x>  
PMID:[9531959](https://pubmed.ncbi.nlm.nih.gov/9531959/)
108. Georgakopoulou EA, Tsimaratou K, Evangelou K, Fernandez Marcos PJ, Zoumpourlis V, Trougakos IP, Kletsas D, Bartek J, Serrano M, Gorgoulis VG. Specific lipofuscin staining as a novel biomarker to detect replicative and stress-induced senescence. A method applicable in cryo-preserved and archival tissues. *Aging (Albany NY).* 2013; 5:37–50.  
<https://doi.org/10.18632/aging.100527>  
PMID:[23449538](https://pubmed.ncbi.nlm.nih.gov/23449538/)
109. Katz ML, Robison WG Jr. What is lipofuscin? Defining characteristics and differentiation from other autofluorescent lysosomal storage bodies. *Arch Gerontol Geriatr.* 2002; 34:169–84.  
[https://doi.org/10.1016/s0167-4943\(02\)00005-5](https://doi.org/10.1016/s0167-4943(02)00005-5)  
PMID:[14764321](https://pubmed.ncbi.nlm.nih.gov/14764321/)
110. Pan C, Banerjee K, Lehmann GL, Almeida D, Hajjar KA, Benedicto I, Jiang Z, Radu RA, Thompson DH, Rodriguez-Boulan E, Nociari MM. Lipofuscin causes atypical necroptosis through lysosomal membrane

- permeabilization. *Proc Natl Acad Sci U S A*. 2021; 118:e2100122118.  
<https://doi.org/10.1073/pnas.2100122118>  
PMID:[34782457](https://pubmed.ncbi.nlm.nih.gov/34782457/)
111. Kakimoto Y, Okada C, Kawabe N, Sasaki A, Tsukamoto H, Nagao R, Osawa M. Myocardial lipofuscin accumulation in ageing and sudden cardiac death. *Sci Rep*. 2019; 9:3304.  
<https://doi.org/10.1038/s41598-019-40250-0>  
PMID:[30824797](https://pubmed.ncbi.nlm.nih.gov/30824797/)
112. Lu JQ, Monaco CM, Hawke TJ, Yan C, Tarnopolsky MA. Increased intra-mitochondrial lipofuscin aggregates with spherical dense body formation in mitochondrial myopathy. *J Neurol Sci*. 2020; 413:116816.  
<https://doi.org/10.1016/j.jns.2020.116816>  
PMID:[32272361](https://pubmed.ncbi.nlm.nih.gov/32272361/)
113. Galluzzi L, Vitale I, Warren S, Adjemian S, Agostinis P, Martinez AB, Chan TA, Coukos G, Demaria S, Deutsch E, Draganov D, Edelson RL, Formenti SC, et al. Consensus guidelines for the definition, detection and interpretation of immunogenic cell death. *J Immunother Cancer*. 2020; 8:e000337.  
<https://doi.org/10.1136/jitc-2019-000337>  
PMID:[32209603](https://pubmed.ncbi.nlm.nih.gov/32209603/)
114. Xu M, Pirtskhalava T, Farr JN, Weigand BM, Palmer AK, Weivoda MM, Inman CL, Ogradnik MB, Hachfeld CM, Fraser DG, Onken JL, Johnson KO, Verzosa GC, et al. Senolytics improve physical function and increase lifespan in old age. *Nat Med*. 2018; 24:1246–56.  
<https://doi.org/10.1038/s41591-018-0092-9>  
PMID:[29988130](https://pubmed.ncbi.nlm.nih.gov/29988130/)
115. Baar MP, Brandt RMC, Putavet DA, Klein JDD, Derks KWJ, Bourgeois BRM, Stryeck S, Rijksen Y, van Willigenburg H, Feijtel DA, van der Pluijm I, Essers J, van Cappellen WA, et al. Targeted Apoptosis of Senescent Cells Restores Tissue Homeostasis in Response to Chemotoxicity and Aging. *Cell*. 2017; 169:132–47.e16.  
<https://doi.org/10.1016/j.cell.2017.02.031>  
PMID:[28340339](https://pubmed.ncbi.nlm.nih.gov/28340339/)
116. Chang J, Wang Y, Shao L, Laberge RM, Demaria M, Campisi J, Janakiraman K, Sharpless NE, Ding S, Feng W, Luo Y, Wang X, Aykin-Burns N, et al. Clearance of senescent cells by ABT263 rejuvenates aged hematopoietic stem cells in mice. *Nat Med*. 2016; 22:78–83.  
<https://doi.org/10.1038/nm.4010> PMID:[26657143](https://pubmed.ncbi.nlm.nih.gov/26657143/)
117. Rysanek D, Vasicova P, Kolla JN, Sedlak D, Andera L, Bartek J, Hodny Z. Synergism of BCL-2 family inhibitors facilitates selective elimination of senescent cells. *Aging (Albany NY)*. 2022; 14:6381–414.  
<https://doi.org/10.18632/aging.204207>  
PMID:[35951353](https://pubmed.ncbi.nlm.nih.gov/35951353/)
118. Yosef R, Pilpel N, Tokarsky-Amiel R, Biran A, Ovadya Y, Cohen S, Vadai E, Dassa L, Shahar E, Condiotti R, Ben-Porath I, Krizhanovsky V. Directed elimination of senescent cells by inhibition of BCL-W and BCL-XL. *Nat Commun*. 2016; 7:11190.  
<https://doi.org/10.1038/ncomms11190>  
PMID:[27048913](https://pubmed.ncbi.nlm.nih.gov/27048913/)
119. Zhu Y, Tchkonina T, Fuhrmann-Stroissnigg H, Dai HM, Ling YY, Stout MB, Pirtskhalava T, Giorgadze N, Johnson KO, Giles CB, Wren JD, Niedernhofer LJ, Robbins PD, et al. Identification of a novel senolytic agent, navitoclax, targeting the Bcl-2 family of anti-apoptotic factors. *Aging Cell*. 2016; 15:428–35.  
<https://doi.org/10.1111/ace1.12445> PMID:[26711051](https://pubmed.ncbi.nlm.nih.gov/26711051/)
120. Tepper CG, Seldin MF, Mudryj M. Fas-mediated apoptosis of proliferating, transiently growth-arrested, and senescent normal human fibroblasts. *Exp Cell Res*. 2000; 260:9–19.  
<https://doi.org/10.1006/excr.2000.4990>  
PMID:[11010806](https://pubmed.ncbi.nlm.nih.gov/11010806/)
121. Soto-Gamez A, Wang Y, Zhou X, Seras L, Quax W, Demaria M. Enhanced extrinsic apoptosis of therapy-induced senescent cancer cells using a death receptor 5 (DR5) selective agonist. *Cancer Lett*. 2022; 525:67–75.  
<https://doi.org/10.1016/j.canlet.2021.10.038>  
PMID:[34728311](https://pubmed.ncbi.nlm.nih.gov/34728311/)
122. Wang L, Jin H, Jochems F, Wang S, Lieftink C, Martinez IM, De Conti G, Edwards F, de Oliveira RL, Schepers A, Zhou Y, Zheng J, Wu W, et al. cFLIP suppression and DR5 activation sensitize senescent cancer cells to senolysis. *Nat Cancer*. 2022; 3:1284–99.  
<https://doi.org/10.1038/s43018-022-00462-2>  
PMID:[36414711](https://pubmed.ncbi.nlm.nih.gov/36414711/)
123. Stagni V, Mingardi M, Santini S, Giaccari D, Barilà D. ATM kinase activity modulates cFLIP protein levels: potential interplay between DNA damage signalling and TRAIL-induced apoptosis. *Carcinogenesis*. 2010; 31:1956–63.  
<https://doi.org/10.1093/carcin/bgq193>  
PMID:[20876284](https://pubmed.ncbi.nlm.nih.gov/20876284/)
124. Belharazem D, Grass A, Paul C, Vitacolonna M, Schalke B, Rieker RJ, Körner D, Jungebluth P, Simon-Keller K, Hohenberger P, Roessner EM, Wiebe K, Gräter T, et al. Increased cFLIP expression in thymic epithelial tumors blocks autophagy via NF-κB signalling. *Oncotarget*. 2017; 8:89580–94.  
<https://doi.org/10.18632/oncotarget.15929>  
PMID:[29163772](https://pubmed.ncbi.nlm.nih.gov/29163772/)
125. Deepa SS, Unnikrishnan A, Matyi S, Hadad N, Richardson A. Necroptosis increases with age and is reduced by dietary restriction. *Aging Cell*. 2018; 17:e12770.

- <https://doi.org/10.1111/accel.12770>  
PMID:[29696779](https://pubmed.ncbi.nlm.nih.gov/29696779/)
126. Royce GH, Brown-Borg HM, Deepa SS. The potential role of necroptosis in inflammaging and aging. *Geroscience*. 2019; 41:795–811.  
<https://doi.org/10.1007/s11357-019-00131-w>  
PMID:[31721033](https://pubmed.ncbi.nlm.nih.gov/31721033/)
127. Thadathil N, Selvarani R, Mohammed S, Nicklas EH, Tran AL, Kamal M, Luo W, Brown JL, Lawrence MM, Borowik AK, Miller BF, Van Remmen H, Richardson A, Deepa SS. Senolytic treatment reduces cell senescence and necroptosis in Sod1 knockout mice that is associated with reduced inflammation and hepatocellular carcinoma. *Aging Cell*. 2022; 21:e13676.  
<https://doi.org/10.1111/accel.13676>  
PMID:[35869934](https://pubmed.ncbi.nlm.nih.gov/35869934/)
128. Catalano A, Rodilossi S, Caprari P, Coppola V, Procopio A. 5-Lipoxygenase regulates senescence-like growth arrest by promoting ROS-dependent p53 activation. *EMBO J*. 2005; 24:170–9.  
<https://doi.org/10.1038/sj.emboj.7600502>  
PMID:[15616590](https://pubmed.ncbi.nlm.nih.gov/15616590/)
129. Kuehnemann C, Jezak S, Mogck B, Kura N, Che Y, Vaittinen M, Siokas I, Tariq R, Deshpande S, Guthrie C, Tan X, Aumontche E, Zheng T, et al. Fatty acid desaturation guides cellular decisions between ferroptosis and cellular senescence. *bioRxiv*. 2024.10.03.616257.  
<https://doi.org/10.1101/2024.10.03.616257>
130. Wu J, Minikes AM, Gao M, Bian H, Li Y, Stockwell BR, Chen ZN, Jiang X. Intercellular interaction dictates cancer cell ferroptosis via NF2-YAP signalling. *Nature*. 2019; 572:402–6.  
<https://doi.org/10.1038/s41586-019-1426-6>  
PMID:[31341276](https://pubmed.ncbi.nlm.nih.gov/31341276/)
131. Fatokun AA, Dawson VL, Dawson TM. Parthanatos: mitochondrial-linked mechanisms and therapeutic opportunities. *Br J Pharmacol*. 2014; 171:2000–16.  
<https://doi.org/10.1111/bph.12416>  
PMID:[24684389](https://pubmed.ncbi.nlm.nih.gov/24684389/)
132. Nehme J, Mesilmany L, Varela-Eirin M, Brandenburg S, Altulea A, Lin Y, Gaya da Costa M, Seelen M, Hillebrands JL, van Goor H, Saab R, Akl H, Prevarskaya N, et al. Converting cell death into senescence by PARP1 inhibition improves recovery from acute oxidative injury. *Nat Aging*. 2024; 4:771–82.  
<https://doi.org/10.1038/s43587-024-00627-x>  
PMID:[38724734](https://pubmed.ncbi.nlm.nih.gov/38724734/)
133. Ashraf HM, Fernandez B, Spencer SL. The intensities of canonical senescence biomarkers integrate the duration of cell-cycle withdrawal. *Nat Commun*. 2023; 14:4527.  
<https://doi.org/10.1038/s41467-023-40132-0>  
PMID:[37500655](https://pubmed.ncbi.nlm.nih.gov/37500655/)
134. Lagares D, Santos A, Grasberger PE, Liu F, Probst CK, Rahimi RA, Sakai N, Kuehl T, Ryan J, Bhola P, Montero J, Kapoor M, Baron M, et al. Targeted apoptosis of myofibroblasts with the BH3 mimetic ABT-263 reverses established fibrosis. *Sci Transl Med*. 2017; 9:eal3765.  
<https://doi.org/10.1126/scitranslmed.aal3765>  
PMID:[29237758](https://pubmed.ncbi.nlm.nih.gov/29237758/)
135. Grosse L, Wagner N, Emelyanov A, Molina C, Lacas-Gervais S, Wagner KD, Bulavin DV. Defined p16<sup>High</sup> Senescent Cell Types Are Indispensable for Mouse Healthspan. *Cell Metab*. 2020 Jul 7; 32:87–99.e6.  
<https://doi.org/10.1016/j.cmet.2020.05.002>  
PMID:[32485135](https://pubmed.ncbi.nlm.nih.gov/32485135/)
136. Behmoaras J, Gil J. Similarities and interplay between senescent cells and macrophages. *J Cell Biol*. 2021; 220:e202010162.  
<https://doi.org/10.1083/jcb.202010162>  
PMID:[33355620](https://pubmed.ncbi.nlm.nih.gov/33355620/)
137. Elder SS, Emmerson E. Senescent cells and macrophages: key players for regeneration? *Open Biol*. 2020; 10:200309.  
<https://doi.org/10.1098/rsob.200309> PMID:[33352064](https://pubmed.ncbi.nlm.nih.gov/33352064/)
138. Zhu Y, Tchkonja T, Pirtskhalava T, Gower AC, Ding H, Giorgadze N, Palmer AK, Ikeno Y, Hubbard GB, Lenburg M, O'Hara SP, LaRusso NF, Miller JD, et al. The Achilles' heel of senescent cells: from transcriptome to senolytic drugs. *Aging Cell*. 2015; 14:644–58.  
<https://doi.org/10.1111/accel.12344>  
PMID:[25754370](https://pubmed.ncbi.nlm.nih.gov/25754370/)
139. Neri F, Basisty N, Desprez PY, Campisi J, Schilling B. Quantitative Proteomic Analysis of the Senescence-Associated Secretory Phenotype by Data-Independent Acquisition. *Curr Protoc*. 2021; 1:e32.  
<https://doi.org/10.1002/cpz1.32>  
PMID:[33524224](https://pubmed.ncbi.nlm.nih.gov/33524224/)
140. Nguyen ND, Rosas L, Khaliullin T, Jiang P, Hasanaj E, Ovando-Ricardez JA, Bueno M, Rahman I, Pryhuber GS, Li D, Ma Q, Finkel T, Königshoff M, et al. scDOT: optimal transport for mapping senescent cells in spatial transcriptomics. *Genome Biol*. 2024; 25:288.  
<https://doi.org/10.1186/s13059-024-03426-0>  
PMID:[39516853](https://pubmed.ncbi.nlm.nih.gov/39516853/)
141. Wang Z, Ge S, Liao T, Yuan M, Qian W, Chen Q, Liang W, Cheng X, Zhou Q, Ju Z, Zhu H, Xiong W. Integrative single-cell metabolomics and phenotypic profiling reveals metabolic heterogeneity of cellular oxidation and senescence. *Nat Commun*. 2025; 16:2740.  
<https://doi.org/10.1038/s41467-025-57992-3>  
PMID:[40113759](https://pubmed.ncbi.nlm.nih.gov/40113759/)

142. Suryadevara V, Hudgins AD, Rajesh A, Pappalardo A, Karpova A, Dey AK, Hertzell A, Agudelo A, Rocha A, Soygur B, Schilling B, Carver CM, Aguayo-Mazzucato C, et al. SenNet recommendations for detecting senescent cells in different tissues. *Nat Rev Mol Cell Biol.* 2024; 25:1001–23.  
<https://doi.org/10.1038/s41580-024-00738-8>  
PMID:[38831121](https://pubmed.ncbi.nlm.nih.gov/38831121/)
143. Duran I, Pombo J, Sun B, Gallage S, Kudo H, McHugh D, Bousset L, Barragan Avila JE, Forlano R, Manousou P, Heikenwalder M, Withers DJ, Vernia S, et al. Detection of senescence using machine learning algorithms based on nuclear features. *Nat Commun.* 2024; 15:1041.  
<https://doi.org/10.1038/s41467-024-45421-w>  
PMID:[38310113](https://pubmed.ncbi.nlm.nih.gov/38310113/)
144. Mahmud S, Zheng C, Santiago FE, Zhang L, Robbins PD, Dong X. A machine learning approach identifies cellular senescence on transcriptome data of human cells *in vitro*. *Geroscience.* 2025; 47:5287–301.  
<https://doi.org/10.1007/s11357-024-01485-6>  
PMID:[39738795](https://pubmed.ncbi.nlm.nih.gov/39738795/)
145. Hughes BK, Wallis R, Bishop CL. Yearning for machine learning: applications for the classification and characterisation of senescence. *Cell Tissue Res.* 2023; 394:1–16.  
<https://doi.org/10.1007/s00441-023-03768-4>  
PMID:[37016180](https://pubmed.ncbi.nlm.nih.gov/37016180/)
146. Mapkar SA, Bliss SA, Perez Carbajal EE, Murray SH, Li Z, Wilson AK, Piprode V, Lee YJ, Kirsch T, Petroff KS, Liu F, Wosczyzna MN. Nuclear morphometrics coupled with machine learning identifies dynamic states of senescence across age. *Nat Commun.* 2025; 16:6231.  
<https://doi.org/10.1038/s41467-025-60975-z>  
PMID:[40624008](https://pubmed.ncbi.nlm.nih.gov/40624008/)
147. Qu Y, Ji B, Dong R, Gu L, Chan C, Xie J, Glass C, Wang XF, Nixon AB, Ji Z. Single-cell and spatial detection of senescent cells using DeepScience. *Cell Genom.* 2025; 5:101035.  
<https://doi.org/10.1016/j.xgen.2025.101035>  
PMID:[41061702](https://pubmed.ncbi.nlm.nih.gov/41061702/)
148. Sanborn MA, Wang X, Gao S, Dai Y, Rehman J. Unveiling the cell-type-specific landscape of cellular senescence through single-cell transcriptomics using SenePy. *Nat Commun.* 2025; 16:1884.  
<https://doi.org/10.1038/s41467-025-57047-7>  
PMID:[39987255](https://pubmed.ncbi.nlm.nih.gov/39987255/)
149. Avelar RA, Ortega JG, Tacutu R, Tyler EJ, Bennett D, Binetti P, Budovsky A, Chatsirisupachai K, Johnson E, Murray A, Shields S, Tejada-Martinez D, Thornton D, et al. A multidimensional systems biology analysis of cellular senescence in aging and disease. *Genome Biol.* 2020; 21:91.  
<https://doi.org/10.1186/s13059-020-01990-9>  
PMID:[32264951](https://pubmed.ncbi.nlm.nih.gov/32264951/)
150. Fernandez B, Passanisi V, Ashraf HM, Spencer SL. Single-cell RNA sequencing reveals distinct senotypes and a quiescence-senescence continuum at the transcriptome level following chemotherapy. *bioRxiv.* 2025; 17:169.  
<https://doi.org/10.1038/s41467-025-66836-z>  
PMID:[40463227](https://pubmed.ncbi.nlm.nih.gov/40463227/)
151. Jochems F, Thijssen B, De Conti G, Jansen R, Pogacar Z, Groot K, Wang L, Schepers A, Wang C, Jin H, Beijersbergen RL, Leite de Oliveira R, Wessels LF, Bernards R. The Cancer SENESCopedia: A delineation of cancer cell senescence. *Cell Rep.* 2021; 36:109441.  
<https://doi.org/10.1016/j.celrep.2021.109441>  
PMID:[34320349](https://pubmed.ncbi.nlm.nih.gov/34320349/)
152. Saul D, Kosinsky RL, Atkinson EJ, Doolittle ML, Zhang X, LeBrasseur NK, Pignolo RJ, Robbins PD, Niedernhofer LJ, Ikeno Y, Jurk D, Passos JF, Hickson LJ, et al. A new gene set identifies senescent cells and predicts senescence-associated pathways across tissues. *Nat Commun.* 2022; 13:4827.  
<https://doi.org/10.1038/s41467-022-32552-1>  
PMID:[35974106](https://pubmed.ncbi.nlm.nih.gov/35974106/)
153. Hughes BK, Davis A, Milligan D, Wallis R, Mossa F, Philpott MP, Wainwright LJ, Gunn DA, Bishop CL. SenPred: a single-cell RNA sequencing-based machine learning pipeline to classify deeply senescent dermal fibroblast cells for the detection of an *in vivo* senescent cell burden. *Genome Med.* 2025; 17:2.  
<https://doi.org/10.1186/s13073-024-01418-0>  
PMID:[39810225](https://pubmed.ncbi.nlm.nih.gov/39810225/)
